# Supplementary material for: An integrated microfluidic/microelectrode array for the study of activity-dependent intracellular dynamics in neuronal networks
Source: Royal Society of Chemistry journal article supplement (doi:10.1039/c8lc00694f), 2018-01-01
Supplement: c8lc00694f1.pdf [file c8lc00694f1.pdf]

Electronic Supplementary Information (ESI)

**An integrated microfluidic/microelectrode array for the study of activity-dependent intracellular dynamics in neuronal networks**

**Eve Moutaux,<sup>a</sup> Benoit Charlot,<sup>b</sup> Aurélie Genoux,<sup>a</sup> Frédéric Saudou,<sup>a,c</sup> and Maxime Cazorla<sup>a</sup>**

*a. Grenoble Institut des Neurosciences, Université Grenoble Alpes, INSERM U1216, Bat. Edmond J. Safran, Chemin F Ferrini, F-38000 Grenoble, France. b. Institut d'Electronique et des Systèmes, Université Montpellier 2, CNRS UMR5214, Bat. 5, 860 Rue St Priest, F-34000 Montpellier, France. c. CHU Grenoble Alpes, F-38000 Grenoble, France.*

**Supplementary Video 1. Live recording of calcium dynamics in cortical axons after high frequency stimulation (related to Figure 3).**

Presynaptic electrode was used to apply a train of 10 APs at 50 Hz (white square) in two adjacent axonal microchannels. The video is accelerated 5x.

**Supplementary Video 2. Live recording of calcium dynamics in postsynaptic target neurons during high frequency stimulation of projecting axons (related to Figure 4).**

Presynaptic electrode was used to apply a train of 10 APs at 50 Hz (white square). The video is accelerated 5x.

**Supplementary Video 3. Postsynaptic calcium dynamics before CNQX/AP5 application (related to Figure 5).**

Presynaptic electrode was used to apply a train of 10 APs at 50 Hz (white square). The video is accelerated 5x.

**Supplementary Video 4. Postsynaptic calcium dynamics after CNQX/AP5 application in synaptic and postsynaptic chambers (related to Figure 5).**

Presynaptic electrode was used to apply a train of 10 APs at 50 Hz (white square). The video is accelerated 5x.
